# Supplementary material for: Differential Impacts of Multimorbidity on COVID-19 Severity across the Socioeconomic Ladder in Hong Kong: A Syndemic Perspective
Source: MDPI journal article supplement (doi:10.3390/ijerph18158168), 2021-08-02
Supplement: s1 [file s1]

**Table S1. International Classification of Diseases, Ninth Revision, Clinical Modification (ICD-9-CM) diagnosis and procedure codes for chronic diseases.**

| Chronic diseases                                                        | ICD-9-CM Code | Description                                                    |
|-------------------------------------------------------------------------|---------------|----------------------------------------------------------------|
| <b>Cardiovascular diseases</b>                                          |               |                                                                |
| Hypertension and hypertensive diseases                                  | 401           | Essential hypertension                                         |
|                                                                         | 402           | Hypertensive heart disease                                     |
|                                                                         | 403           | Hypertensive chronic kidney disease                            |
|                                                                         | 404           | Hypertensive heart and chronic kidney disease                  |
|                                                                         | 405           | Secondary hypertension                                         |
| Ischemic heart disease                                                  | 410           | Acute myocardial infarction                                    |
|                                                                         | 411           | Other acute and subacute forms of ischemic heart disease       |
|                                                                         | 412           | Old myocardial infarction                                      |
|                                                                         | 413           | Angina pectoris                                                |
|                                                                         | 414           | Other forms of chronic ischemic heart disease                  |
| Cardiac dysrhythmias                                                    | 427           | Cardiac dysrhythmias                                           |
| Heart failure                                                           | 428           | Heart failure                                                  |
| <b>Digestive diseases</b>                                               |               |                                                                |
| Peptic ulcer                                                            | 530.2         | Ulcer of esophagus                                             |
|                                                                         | 531           | Gastric ulcer                                                  |
|                                                                         | 532           | Duodenal ulcer                                                 |
|                                                                         | 533           | Peptic ulcer site unspecified                                  |
|                                                                         | 534           | Gastrojejunal ulcer                                            |
| Chronic liver disease, liver failure, liver cirrhosis and complications | 070.2-3       | Chronic hepatitis B                                            |
|                                                                         | 070.41, 44    | Hepatitis C with hepatic coma                                  |
|                                                                         | 070.51, 54    | Hepatitis C without mention of hepatic coma                    |
|                                                                         | V02.61        | Hepatitis B carrier                                            |
|                                                                         | V02.62        | Hepatitis C carrier                                            |
|                                                                         | 070.42, 52    | Hepatitis delta without mention of active hepatitis B          |
|                                                                         | 275.0         | Hemochromatosis                                                |
|                                                                         | 275.1         | Wilson's disease                                               |
|                                                                         | 273.4         | Alpha-1 antitrypsin disease                                    |
|                                                                         | 570           | Acute and subacute necrosis of liver                           |
|                                                                         | 571           | Chronic liver disease and cirrhosis                            |
|                                                                         | 572           | Liver abscess and sequelae of chronic liver disease            |
|                                                                         | 573.0-5       | Other disorders of liver                                       |
|                                                                         | 348.3         | Encephalopathy, unspecified                                    |
|                                                                         | 349.82        | Toxic encephalopathy                                           |
|                                                                         | 456.0, 20     | Esophageal varices with bleeding                               |
|                                                                         | 456.1, 21     | Esophageal varices without bleeding                            |
|                                                                         | 456.8:1-2     | Bleeding gastric varices                                       |
|                                                                         | 456.8:4-5     | Gastric varices                                                |
|                                                                         | 567.2:9       | Spontaneous bacterial peritonitis                              |
|                                                                         | 789.5         | Ascites                                                        |
| Biliary disease                                                         | 574           | Cholelithiasis                                                 |
|                                                                         | 575           | Disorders of gallbladder                                       |
|                                                                         | 576           | Disorders of biliary tract                                     |
| Gastrointestinal hemorrhage                                             | 578           | Gastrointestinal hemorrhage                                    |
| <b>Diabetes</b>                                                         |               |                                                                |
| Diabetes mellitus                                                       | 250           | Diabetes mellitus                                              |
| <b>Cancers</b>                                                          |               |                                                                |
| Malignant neoplasm                                                      | 140-149       | Malignant neoplasm of lip, oral cavity, and pharynx            |
|                                                                         | 150-159       | Malignant neoplasm of digestive organs and peritoneum          |
|                                                                         | 160-165       | Malignant neoplasm of respiratory and intrathoracic organ      |
|                                                                         | 170-176       | Malignant neoplasm of bone, connective tissue, skin, and breas |
|                                                                         | 179-189       | Malignant neoplasm of genitourinary organs                     |
|                                                                         | 190-199       | Malignant neoplasm of other and unspecified sites              |
|                                                                         | 200-209       | Malignant neoplasm of lymphatic and hematopoietic tissue       |
|                                                                         | 235-238       | Neoplasms of uncertain behavior                                |
|                                                                         | 239           | Neoplasms of unspecified nature                                |
|                                                                         | V58.1         | Encounter for antineoplastic chemotherapy and immunotherapy    |
| Chemotherapy                                                            | V66.2         | Convalescence following chemotherapy                           |
|                                                                         | V67.2         | Follow-up examination, following chemotherapy                  |

|                                                               |         |                                                                    |
|---------------------------------------------------------------|---------|--------------------------------------------------------------------|
| History of cancer                                             | 99.25   | Injection or infusion of cancer chemotherapeutic substance         |
|                                                               | V10     | Personal history of cancer                                         |
| <b>Nervous system diseases</b>                                |         |                                                                    |
| Cerebrovascular events                                        | 430     | Subarachnoid hemorrhage                                            |
|                                                               | 431     | Intracerebral hemorrhage                                           |
|                                                               | 432     | Other and unspecified intracranial hemorrhage                      |
|                                                               | 433     | Occlusion and stenosis of precerebral arteries                     |
|                                                               | 434     | Occlusion of cerebral arteries                                     |
|                                                               | 435     | Transient cerebral ischemia                                        |
|                                                               | 436     | Acute, but ill-defined, cerebrovascular disease                    |
|                                                               | 437     | Other and ill-defined cerebrovascular disease                      |
|                                                               | 438     | Late effects of cerebrovascular disease                            |
| Other nervous system disease                                  | 320-327 | Inflammatory diseases of the central nervous system                |
|                                                               | 330-337 | Hereditary and degenerative diseases of the central nervous system |
|                                                               | 340-345 | Other disorders of the central nervous system                      |
| <b>Respiratory diseases</b>                                   |         |                                                                    |
| Pneumonia                                                     | 480     | Viral pneumonia (other than SARS-CoV and SARS-CoV-2)               |
|                                                               | 481     | Pneumococcal pneumonia [Streptococcus pneumoniae pneumonia]        |
|                                                               | 482     | Other bacterial pneumonia                                          |
|                                                               | 483     | Pneumonia due to other specified organism                          |
|                                                               | 484     | Pneumonia in infectious diseases classified elsewhere              |
|                                                               | 485     | Bronchopneumonia, organism unspecified                             |
|                                                               | 486     | Pneumonia, organism unspecified                                    |
| Influenza with respiratory manifestations                     | 487     | Influenza with respiratory manifestations                          |
| Chronic obstructive pulmonary disease and allied conditions   | 490-496 | Chronic obstructive pulmonary disease and allied conditions        |
| Pneumoconioses and other lung diseases due to external agents | 500-508 | Pneumoconioses and other lung diseases due to external agents      |
| Other diseases of respiratory system                          | 510-519 | Other diseases of respiratory system                               |
| <b>Kidney diseases</b>                                        |         |                                                                    |
| Nephritis, nephrotic syndrome, and nephrosis                  | 581     | Nephrotic syndrome                                                 |
|                                                               | 582     | Chronic glomerulonephritis                                         |
|                                                               | 583     | Nephritis and nephropathy not specified as acute or chronic        |
|                                                               | 584     | Acute kidney failure                                               |
|                                                               | 585     | Chronic kidney disease                                             |
|                                                               | 586     | Renal failure, unspecified                                         |
|                                                               | 587     | Renal sclerosis, unspecified                                       |
|                                                               | 588     | Disorders resulting from impaired renal function                   |
| Renal replacement therapy                                     | V56     | Encounter for dialysis and dialysis catheter care                  |
|                                                               | 38.95   | Venous catheterization for renal dialysis                          |
|                                                               | 39.27   | Arteriovenostomy for renal dialysis                                |
|                                                               | 39.42   | Revision of arteriovenous shunt for renal dialysis                 |
|                                                               | 39.43   | Removal of arteriovenous shunt for renal dialysis                  |
|                                                               | 39.95   | Hemodialysis                                                       |
|                                                               | 54.98   | Peritoneal dialysis                                                |
| <b>Human immunodeficiency virus (HIV) infection</b>           |         |                                                                    |
| HIV                                                           | 042     | HIV disease.                                                       |
| HIV                                                           | 079.53  | HIV, type 2 [HIV-2]                                                |
| HIV                                                           | V02.9:1 | HIV carrier                                                        |
| HIV                                                           | V08     | Asymptomatic HIV infection status                                  |

ICD-9-CM = International Classification of Diseases, Ninth Revision, Clinical Modification.

**Table S2.** Associations of socioeconomic position, multimorbidity and other risk factors with COVID-19 severity based on multi-level binary logistic regression with random effects specified for all individual-level variables

|                                       |                           | <b>Severe COVID-19</b>    |                 |
|---------------------------------------|---------------------------|---------------------------|-----------------|
|                                       |                           | aOR [95% CI] <sup>a</sup> | <i>p</i> -value |
| <b>Age, year</b>                      |                           | 1.04 [1.04-1.05]          | <0.001          |
| <b>Sex</b>                            |                           |                           |                 |
|                                       | Female                    | Ref                       |                 |
|                                       | Male                      | 2.02 [1.57-2.59]          | <0.001          |
| <b>Presence of symptom onset</b>      |                           |                           |                 |
|                                       | Asymptomatic              | Ref                       |                 |
|                                       | Symptomatic               | 1.95 [1.34-2.84]          | 0.001           |
| <b>Multimorbidity</b>                 |                           |                           |                 |
|                                       | Non-multimorbid           | Ref                       |                 |
|                                       | Multimorbid               | 2.26 [1.71-2.98]          | <0.001          |
| <b>Housing type</b>                   |                           |                           |                 |
|                                       | Public rental housing     | Ref                       |                 |
|                                       | Subsidized home ownership | 1.00 [0.66-1.52]          | 0.997           |
|                                       | Private housing           | 1.10 [0.82-1.48]          | 0.536           |
|                                       | Residential care homes    | 1.39 [0.85-2.27]          | 0.188           |
|                                       | Others                    | 1.53 [0.83-2.83]          | 0.171           |
| <b>Area-level income-poverty rate</b> |                           |                           |                 |
|                                       | Low                       | Ref                       |                 |
|                                       | Medium                    | 1.11 [0.69-1.77]          | 0.669           |
|                                       | High                      | 1.17 [0.74-1.86]          | 0.503           |
| <b>Area-level population density</b>  |                           |                           |                 |
|                                       | Low                       | Ref                       |                 |
|                                       | Medium                    | 1.37 [0.86-2.18]          | 0.182           |
|                                       | High                      | 1.35 [0.85-2.13]          | 0.203           |

<sup>a</sup> Variables listed above were mutually adjusted

**Table S3. Modification of the effect of multimorbidity on COVID-19 severity by quartiles of area-level income-poverty rate**

|                                                 | Non-multimorbid                 |                         | Multimorbid                     |                         | Effect for multimorbidity within strata of area-level income-poverty rate |                 |
|-------------------------------------------------|---------------------------------|-------------------------|---------------------------------|-------------------------|---------------------------------------------------------------------------|-----------------|
|                                                 | aOR<br>[95% CI]<br><sup>a</sup> | <i>p</i> -<br>valu<br>e | aOR<br>[95% CI]<br><sup>a</sup> | <i>p</i> -<br>valu<br>e | aOR [95%<br>CI] <sup>a</sup>                                              | <i>p</i> -value |
| <b>Area-level income-poverty rate</b>           |                                 |                         |                                 |                         |                                                                           |                 |
| 1 <sup>st</sup> quartile (lowest poverty rate)  | Ref                             |                         | 0.76<br>[0.22-<br>2.57]         | 0.65<br>9               | 0.76 [0.22-<br>2.57]                                                      | 0.659           |
| 2 <sup>nd</sup> quartile                        | 0.76<br>[0.33-<br>1.80]         | 0.53<br>8               | 1.23<br>[0.52-<br>2.90]         | 0.64<br>4               | 1.60 [0.80-<br>3.23]                                                      | 0.187           |
| 3 <sup>rd</sup> quartile                        | 0.72<br>[0.33-<br>1.58]         | 0.41<br>4               | 2.10<br>[0.96-<br>4.57]         | 0.06<br>2               | 2.75 [1.53-<br>4.91]                                                      | 0.001           |
| 4 <sup>th</sup> quartile (highest poverty rate) | 0.80<br>[0.36-<br>1.79]         | 0.58<br>3               | 2.03<br>[0.91-<br>4.54]         | 0.08<br>5               | 2.65 [1.43-<br>4.91]                                                      | 0.002           |

Measure of effect modification of multimorbid\*2<sup>nd</sup> quartile of income-poverty rate on multiplicative scale: ratio of aORs [95% CI] = 2.11 [0.52–8.49]; *p*-value = 0.293.

Measure of effect modification of multimorbid\*3<sup>rd</sup> quartile of income-poverty rate on multiplicative scale: ratio of aORs [95% CI] = 3.83 [1.06–13.86]; *p*-value = 0.041.

Measure of effect modification of multimorbid\*4<sup>th</sup> quartile of income-poverty rate on multiplicative scale: ratio of aORs [95% CI] = 3.35 [0.90–12.51]; *p*-value = 0.072.

Measure of effect modification of multimorbid\*2<sup>nd</sup> quartile of income-poverty rate on additive scale: RERI<sub>OR</sub> [95% CI] = 0.73 [-0.33–1.80]; *p*-value = 0.178.

Measure of effect modification of multimorbid\*3<sup>rd</sup> quartile of income-poverty rate on additive scale: RERI<sub>OR</sub> [95% CI] = 1.77 [0.51–3.03]; *p*-value = 0.006.

Measure of effect modification of multimorbid\*4<sup>th</sup> quartile of income-poverty rate on additive scale: RERI<sub>OR</sub> [95% CI] = 1.57 [0.23–2.90]; *p*-value = 0.022.

<sup>a</sup> Adjusted for age, sex, presence of symptom onset, housing type, and area-level population density.
